and following administration of the volatile anesthetics have not been determined so far. This study has pointed out that the antagonism of vecuronium paralysis by neostigmine will probably restore, within 15 min, train-of-four ratios above 75%. Nevertheless, it is quite evident that the safety margin of the neuromuscular transmission is not always reset by neostigmine at the same level, depending on the nature of the anesthetic regimen used. According to this, the observation of different motoneuronal stimulation patterns, including high tetanic stimulation rates, seems mandatory in any clinical trial devoted to detect slight residual impairments of the neuromuscular transmission.

From a practical point of view, one must underline that the present results may not reflect exactly the day-to-day routine where, at the end of anesthesia, the end-tidal concentration of the halogenated vapors are generally decreased below 1 MAC when paralysis reversal with anticholinesterasic agents is performed.

In conclusion, we found mean trains-of-four above 75% at 15 min following the administration of 40  $\mu\text{g}/\text{kg}$  neostigmine iv given at 25% of spontaneous twitch height recovery during anesthesia with F/N<sub>2</sub>O; HAL, ENFL, or ISO. Depending on the halogenated anesthetic received, the recording of a train-of-four above 75% is not necessarily accompanied, for the adductor pollicis muscle, by the recovery of a normal neuromuscular transmission, as profound tetanic fades are yet recordable, especially during ENFL and ISO anesthesia.

The authors are grateful to Professor J. Primo-Dubois, Department of Anesthesia, Brugmann Hospital, for her cooperation in organizing the clinical sessions, and to Professor M. de Rood, Department of Anesthesia, Erasme Hospital, for her help in the preparation of the manuscript. We thank Mrs. Stiennon for her skillful secretarial help.

#### REFERENCES

1. Katz RL, Gissen AJ: Neuromuscular and electromyographic effects of halothane and its interaction with d-tubocurarine in man. *ANESTHESIOLOGY* 28:564-569, 1967
2. Walts LF, Dillon JB: The influence of the anesthetic agent on the action of curare in man. *Anesth Analg* 49:17-22, 1970
3. Katz RL: Modifications of the action of pancuronium by succinylcholine and halothane. *ANESTHESIOLOGY* 35:602-606, 1971

4. Fogdall RP, Miller RD: Neuromuscular effects of enflurane, alone and with d-tubocurarine, pancuronium, and succinylcholine, in man. *ANESTHESIOLOGY* 42:173-178, 1975
5. Lebowitz MH, Blitt CD, Walts LF: Depression of twitch response to stimulation of the ulnar nerve during Ethrane anesthesia in man. *ANESTHESIOLOGY* 33:52-56, 1970
6. Delisle S, Bevan DR: Impaired antagonism of pancuronium during enflurane anaesthesia in man. *Br J Anaesth* 54:441-445, 1982
7. d'Hollander A, Capouet V, Czerucki R, Bomblet JP, Govaerts M: Comparative value of peripheral and central venous  $\text{pCO}_2$  to predict normal  $\text{paCO}_2$  during anesthesia. *Can J Anaesth* 31: 439-444, 1984
8. Hayes JK, Westenskow DR, Jordan WS: Monitoring anesthetic vapor concentrations using a Piezoelectric detector. Evaluation of the Engström Emma. *ANESTHESIOLOGY* 59:435-439, 1983
9. Gion H, Saidman LJ: The minimum alveolar concentration of enflurane in man. *ANESTHESIOLOGY* 35:361-364, 1971
10. Stevens WC, Dolan WM, Gibbons RT: Minimum alveolar concentration (MAC) of isoflurane with and without nitrous oxide in patients of various ages. *ANESTHESIOLOGY* 42:197-200, 1975
11. Saidman LJ, Eger EI II, Munson ES: Minimum alveolar concentrations of methoxyflurane, halothane, ether and cyclopropane in man: Correlation with theories of anesthesia. *ANESTHESIOLOGY* 28:994-1002, 1967
12. Stanski DR, Ham J, Miller RD, Sheiner LB: Time dependent increase in sensitivity to d-tubocurarine during enflurane anesthesia. *ANESTHESIOLOGY* 51:235-241, 1979
13. Hull CH, Nie N: SPSS update 7-9, Npar tests: Nonparametric Test. New York, McGraw-Hill, 1981, pp 220-239
14. Miller RD, Way WL, Doland WM, Stevens WC, Eger EI II: The dependence of Pancuronium- and d-Tubocurarine-induced neuromuscular blockades on alveolar concentrations of halothane and forane. *ANESTHESIOLOGY* 37:573-581, 1972
15. Waud BE: Decrease in dose requirement of d-tubocurarine by volatile anesthetics. *ANESTHESIOLOGY* 51:298-302, 1979
16. Waud BE, Waud DR: Effects of volatile anesthetics on directly and indirectly stimulated skeletal muscle. *ANESTHESIOLOGY* 50:103-110, 1979
17. Rupp SM, Miller RD, Gencarelli P: Vecuronium-induced neuromuscular blockade during enflurane, isoflurane and halothane in humans. *ANESTHESIOLOGY* 60:102-105, 1984
18. Hennart D, d'Hollander A, Plasman C, Dejonckheere M: Importance of the level of paralysis recovery for a rapid antagonism of atracurium neuromuscular blockade with moderate doses of edrophonium. *ANESTHESIOLOGY* 64:384-386, 1986
19. Ali HH, Utting JE, Gray TC: Quantitative assessment of residual antidepolarizing block (part II). *Br J Anaesth* 43:478-482, 1971
20. Ali HH, Wilson RS, Savarese JJ, Kitz RJ: The effect of tubocurarine on indirectly elicited train of four muscle response and respiratory measurements in humans. *Br J Anaesth* 47:570-575, 1975

#### Erratum

In a Clinical Report (Kessler MR, Eide T, Humayun B, Poppers PJ: Spurious oximeter desaturation with methylene blue injection. *ANESTHESIOLOGY* 65:435-436, 1986), figure 2 was adapted from a chapter in a book (Kirk-Othmer, Encyclopedia of Chemical Technology, volume 5. Edited by Mark HF, McKetta JJ Jr, Othmer DF. New York, John Wiley & Sons, Inc., 1964, p 764). The legend for figure 2 should also include the statement: Reprinted by permission of John Wiley & Sons, Inc., Copyright ©1964 by John Wiley & Sons, Inc. On behalf of the authors, *ANESTHESIOLOGY* regrets any inconvenience caused by this omission.
